# Supplementary material for: Monitoring protein-metal binding by 19F NMR – a case study with the New Delhi metallo-β-lactamase 1
Source: Royal Society of Chemistry journal article supplement (doi:10.1039/c9md00416e), 2020-01-01
Supplement: c9md00416e1.pdf [file c9md00416e1.pdf]

## Supporting Information

Monitoring protein-metal binding by  $^{19}\text{F}$  NMR – A case study with the New Delhi metallo- $\beta$ -lactamase

1

Anna M. Rydzik<sup>a‡§</sup>, Jürgen Brem<sup>a‡</sup>, Shane A. Chandler<sup>a</sup>, Justin L.P. Benesch<sup>a</sup>, Timothy D. W. Claridge<sup>a</sup>, and Christopher J. Schofield<sup>a\*</sup>

<sup>a</sup>*The Department of Chemistry, University of Oxford, 12 Mansfield Road, Oxford, OX1 3TA, United Kingdom.*

<sup>‡</sup>*These authors contributed equally to this work.*

<sup>§</sup>*Current address: Research and Early Development, Respiratory, Inflammation and Autoimmunity, BioPharmaceuticals R&D, AstraZeneca, Gothenburg, Sweden.*

<sup>\*</sup> *Correspondence to: christopher.schofield@chem.ox.ac.uk*

## Experimental Details

Chemicals were from Sigma-Aldrich, or as stated otherwise. The purity of ZnSO<sub>4</sub>, CdSO<sub>4</sub> and MnSO<sub>4</sub>, used in titrations was ≥99.99%. Recombinant NDM-1 M67C (> 95% purity by SDS PAGE analysis) was produced and labelled using bromotrifluoroacetone (BFA) via a reported protocol.<sup>1</sup> Apo-NDM-1\* was generated using a reported protocol.<sup>2</sup> In brief, di-Zn(II) NDM-1\* solutions were dialysed against three changes of > 100 volumes of the original solution of an EDTA-containing solution (50 mM HEPES pH 7.5, 200 mM NaCl, 20 mM EDTA, 2 mM TCEP·HCl). EDTA was removed by a second dialysis of three changes of > 100 volumes of a metal-free solution (50 mM HEPES pH 7.5, 200 mM NaCl, 2 mM TCEP·HCl, Chelex 100). All dialyses were carried out at 4 °C using 2K Slide-A-Lyzer<sup>®</sup> Dialysis Cassettes (Thermo Scientific). Samples containing apo NDM-1 were stored at -80 °C; prior to NMR measurement they were thawed on ice and buffer exchanged using a Bio-Spin<sup>®</sup> 6 column (Bio-Rad) to give the final buffer (HEPES/MES buffer (50 mM, pH 7.5, 6.5 or 5.5 respectively) which was supplemented with 200 mM NaCl and 10% D<sub>2</sub>O.

### <sup>19</sup>F NMR measurements

<sup>19</sup>F NMR measurements were conducted at 298 K using a Bruker AVIII HD 600 spectrometer equipped with a 5mm z-gradient broadband Prodigy N<sub>2</sub>-cryoprobe constructed with no fluorine background operating at 298K. Samples contained apo NDM-1\* (60 μM) in HEPES buffer (50 mM, pH 7.5) supplemented with 200 mM NaCl and 10% D<sub>2</sub>O in 5 mm diameter NMR tubes (Norell). Spectra were recorded typically using 128 scans. Data were processed using TopSpin 3.1 software (Bruker) and were referenced to an internal trifluoroacetic acid (TFA) standard ( $\delta$  - 75.45 ppm) as reported.<sup>1</sup>

### Non-denaturing Mass Spectrometry measurements

Protein samples were buffer exchanged into a 200 mM NH<sub>4</sub>OAc aqueous solution using a Bio-Spin spin column (Bio-Rad, Hercules, USA). Samples were further diluted with NH<sub>4</sub>OAc (Sigma-Aldrich, Gillingham, UK) to 5 μM to which a solution of zinc acetate was added at the required ratio, resulting in a final protein concentration of 2.5 μM. The protein-zinc solution was incubated on ice for 1.5 hours prior to analysis. Non-denaturing mass spectrometry was performed in the positive ion mode on the incubated samples as described,<sup>3</sup> using a nano-electrospray source and gold-coated borosilicate capillaries. Capillaries were prepared in-house using a model P-97(Sutter Instruments) capillary puller and a sputter coater (Polaron, Newhaven, United Kingdom). Ions were introduced into a Q Exactive hybrid quadrupole-Orbitrap mass spectrometer (Thermo Fisher Scientific, Bremen Germany) modified for the transmission, selection and detection of high mass ions (Rose et al., 2012).<sup>4</sup> All spectra were

acquired in the 'Native Mode' with no in-source activation nor HCD activation voltage applied. The Orbitrap analyser was operated at a nominal resolution of 17,500 and the AGC target was  $1 \times 10^6$ . The collision gas was nitrogen and UHV pressure was maintained at approximately  $1 \times 10^{-9}$  mbar. Spectra were acquired with 10 microscans, averaged over a minimum of 100 scans and with a noise level parameter set to 3. Each protein-zinc analysis was performed in duplicate or triplicate from separate zinc incubations. Spectra were acquired and then averaged using Thermo Scientific Xcalibur 2.1.

## Table

**Table S1.** Reported data on the kinetic properties of labeled and unlabeled NDM-1 variants.<sup>1</sup>

| <b>Enzyme</b> |            | <b>K<sub>M</sub> [μM]</b> | <b>k<sub>cat</sub> [s<sup>-1</sup>]</b> |
|---------------|------------|---------------------------|-----------------------------------------|
| NDM-1         | Meropenem  | 77±4                      | 235±5.6                                 |
| NDM-1*        | Meropenem  | 55±9                      | 68±4                                    |
| NDM-1         | Nitrocefin | 9±2                       | 25±2                                    |
| NDM-1*        | Nitrocefin | 6±1                       | 23±1                                    |

## Figures

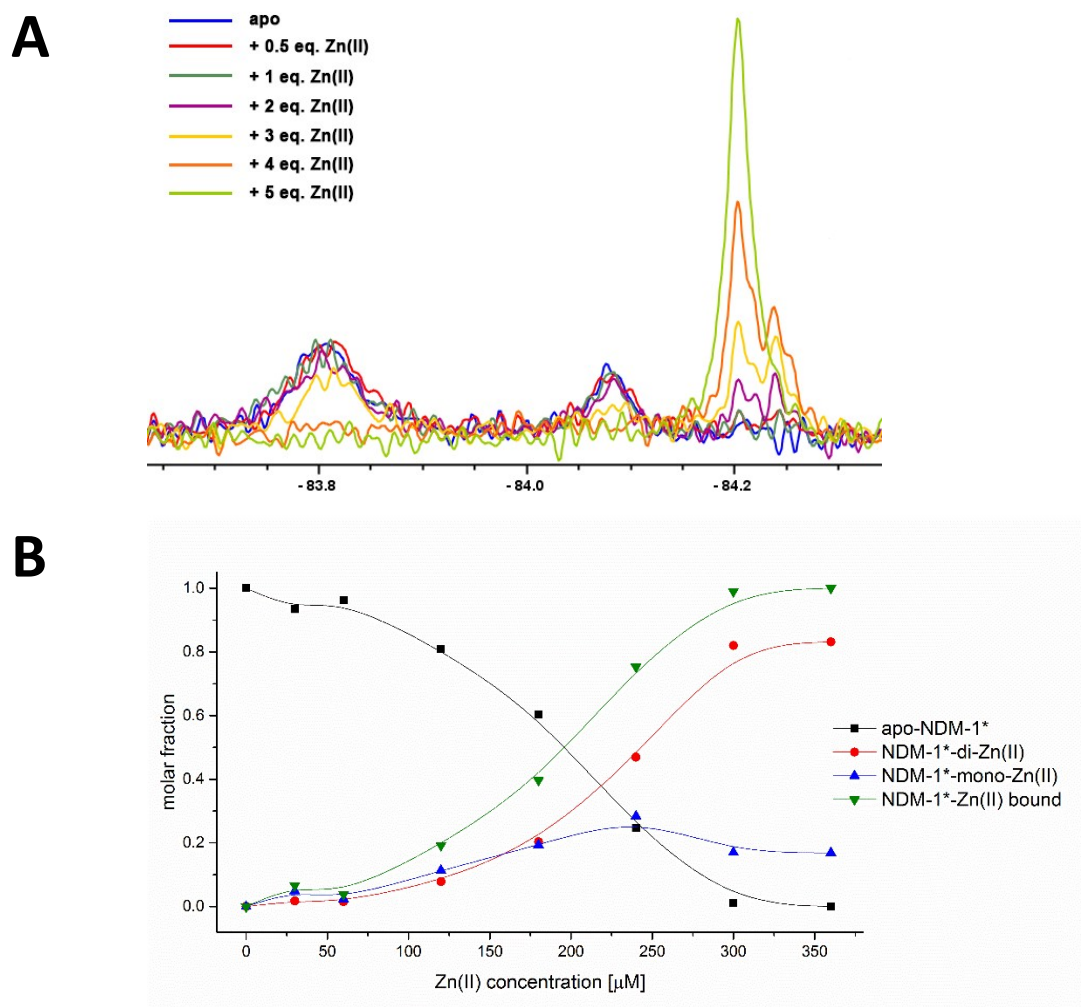

**Figure S1.** Formation of the assigned mono-Zn(II) and di-Zn(II) NDM-1\* (60  $\mu\text{M}$ ) bound species at pH 7.5 as monitored by  $^{19}\text{F}$  NMR, following addition of different Zn(II) equivalents. See Experimental Section for methods.

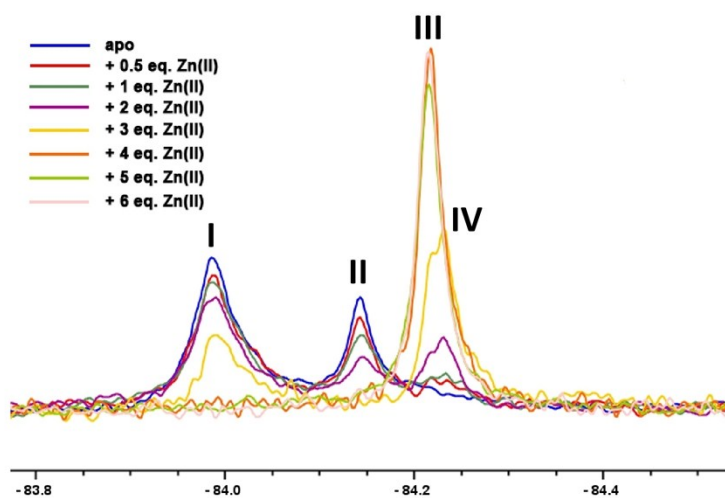

**Figure S2.** Titration of apo-NDM-1\* (60 μM) with Zn(II) at pH 6.5. See Experimental Section for methods.

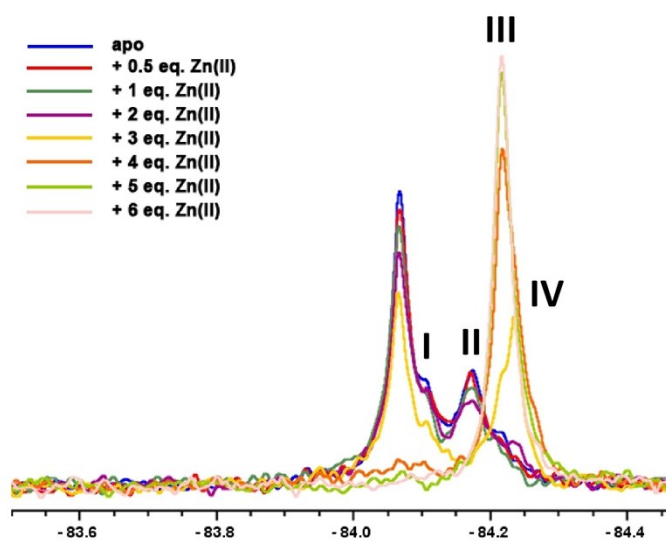

**Figure S3.** Titration of apo-NDM-1\* (60 μM) with Zn(II) at pH 5.5. See Experimental Section for methods.

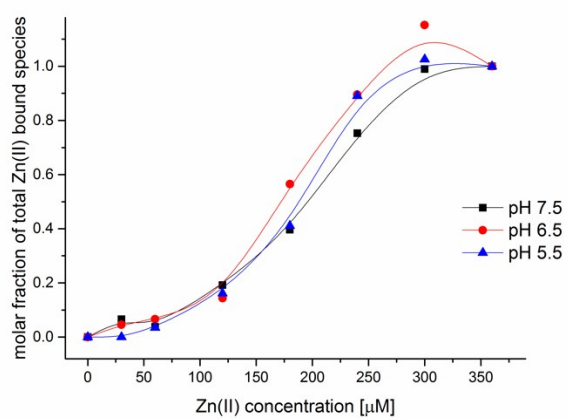

**Figure S4.** Summary of Zn(II) binding to apo-NDM-1\* (60 μM) at different pH values.

**A**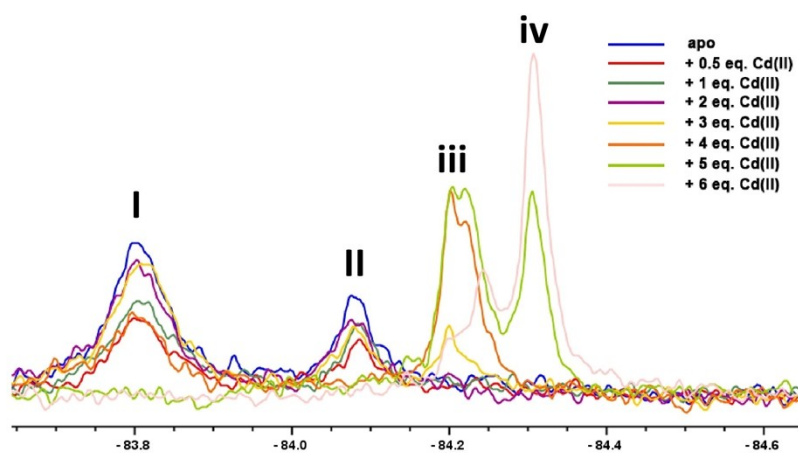**B**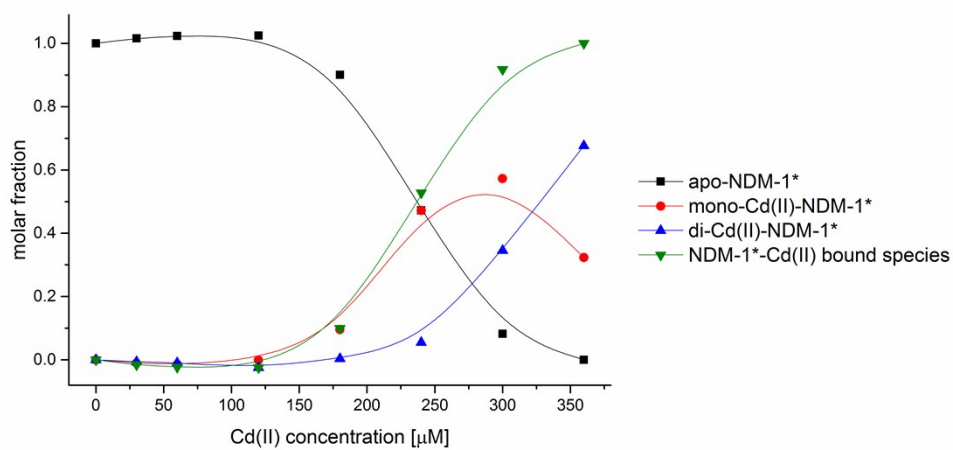

**Figure S5.** Formation of the assigned mono-Cd(II) and di-Cd(II) NDM-1\* (60  $\mu\text{M}$  NDM-1\*) bound species at pH 7.5 as monitored by  $^{19}\text{F}$  NMR, following addition of different Cd(II) equivalents. See Experimental Section for methods.



**A**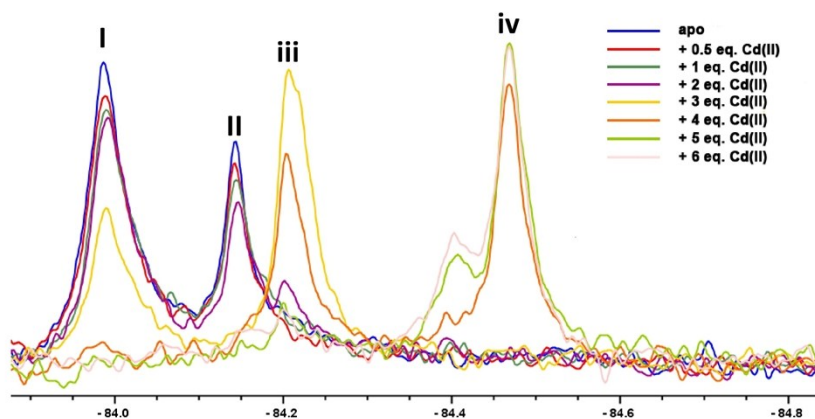**B**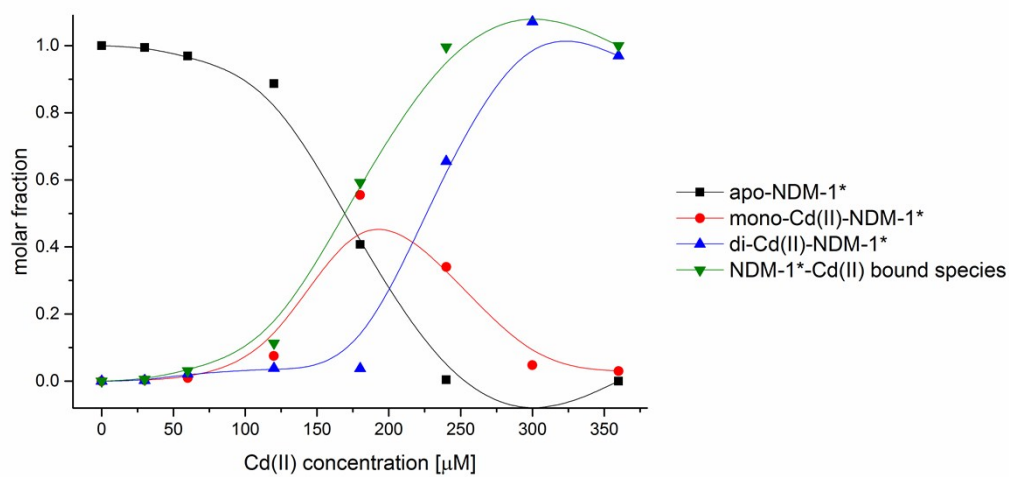

**Figure S6.** Formation of the assigned mono-Cd(II) and di-Cd(II) NDM-1\* (60  $\mu\text{M}$  NDM-1\*) bound species at pH 6.5 as monitored by  $^{19}\text{F}$  NMR. See Experimental Section for methods.

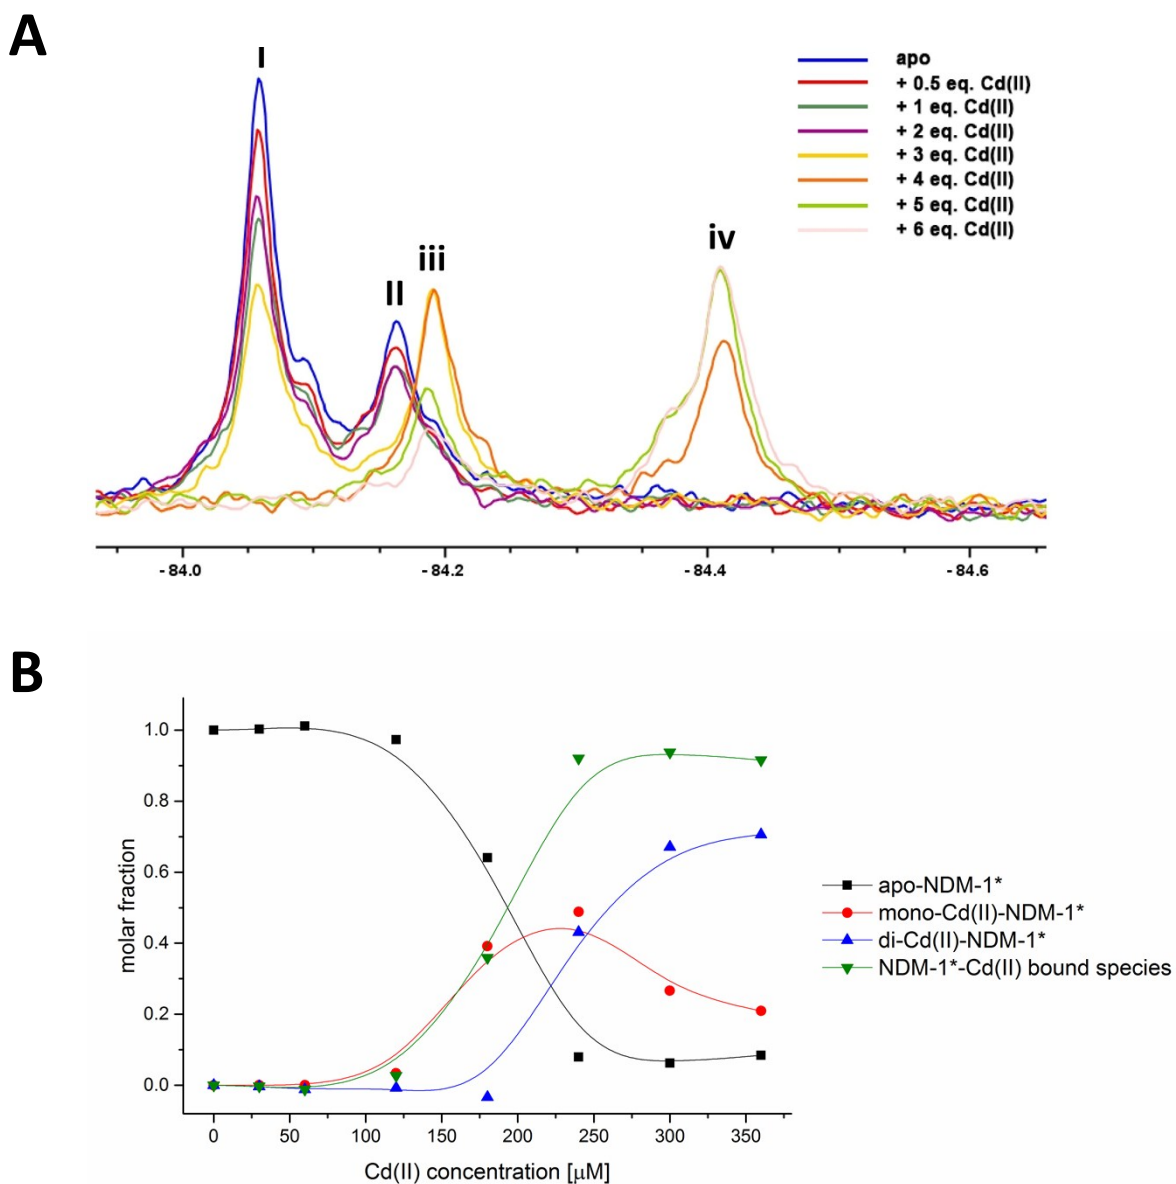

**Figure S7.** Formation of mono-Cd(II) and di-Cd(II) NDM-1\* (60  $\mu\text{M}$  NDM-1\*) bound species at pH 5.5 as monitored by  $^{19}\text{F}$  NMR. See Experimental Section for methods.

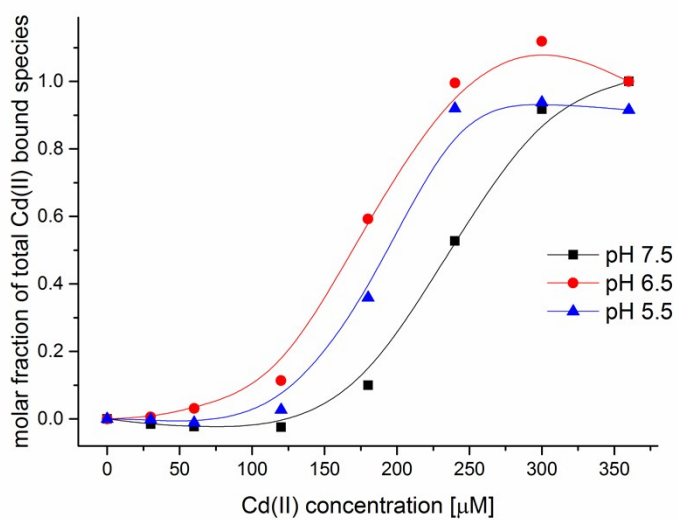

**Figure S8.** Summary of  $^{19}\text{F}$  NMR results comparing Cd(II) binding to apo-NDM-1\* (60  $\mu\text{M}$  NDM-1\*) at different pH values.

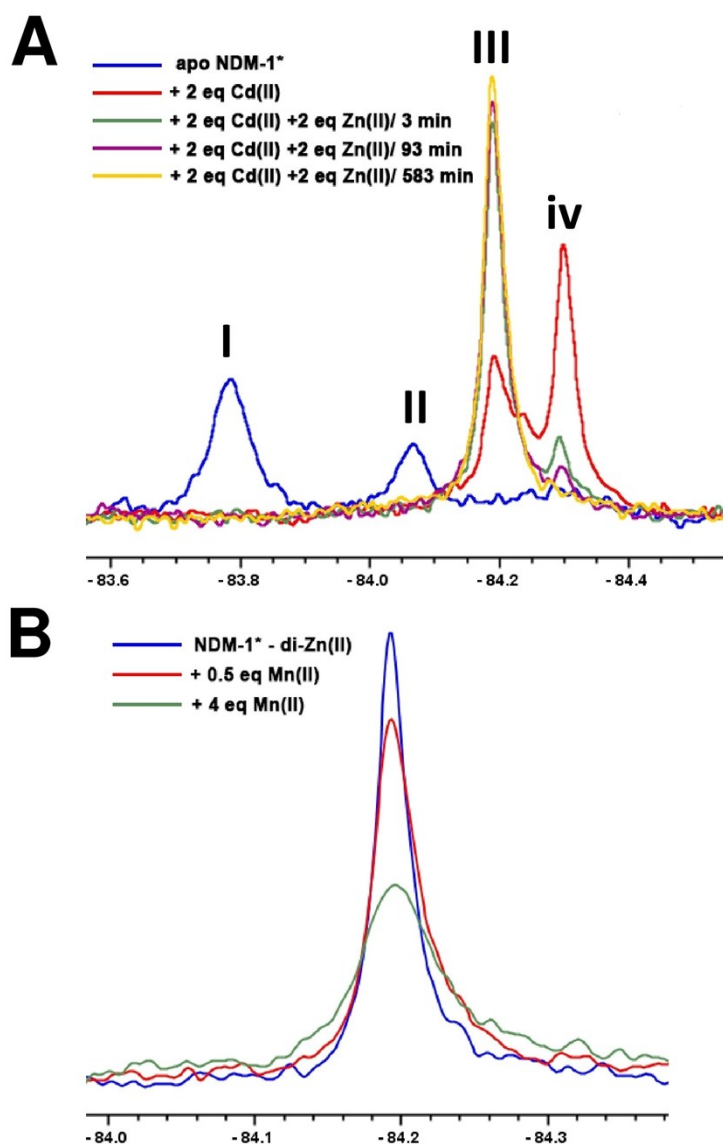

**Figure S9. Metal displacement experiments.** (A) The assigned NDM-1\*-Cd(II) complex (red) (60  $\mu$ M) was treated with 2 equiv. of Zn(II) (green, purple, orange). The results imply Zn(II) ions bind with higher affinity than Cd(II) ions. Addition of 2 equiv. of Zn(II) to the mixture of NDM-1\* equilibrated with 2 equiv. of Cd(II) yields resonances corresponding to the assigned di-Zn(II) bound species with loss of the assigned di-Cd(II) species. Due to overlap of signals it is uncertain if any mono-Cd(II) bound species are present. (B) NDM-1\*-Zn(II) complex (60  $\mu$ M) treated with 0.5 and 4 equiv. of Mn(II). On titration with Mn(II) broadening of the resonances corresponding to the assigned di-NDM-1\*-Zn(II) species is observed likely due to the paramagnetic nature of Mn(II). See Experimental Section for methods.

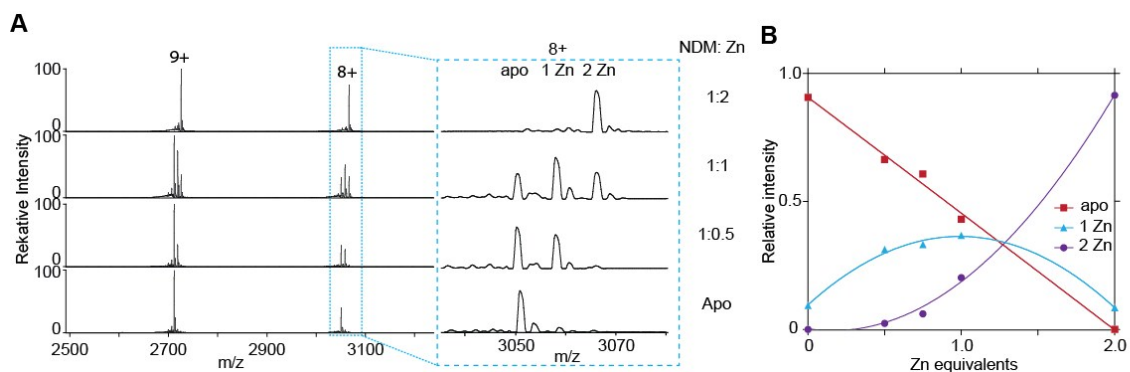

**Figure S10.** Investigation of zinc binding stoichiometry to NDM-1 (2.5  $\mu\text{M}$ ) using non-denaturing mass spectrometry. (A) Mass spectra of NDM-1 show up to two zinc bound to the apo protein after titration and incubation with  $\text{Zn}(\text{OAc})_2$  for 1.5 hours. (B) Occupancy of zinc binding sites throughout the titration using data averaged across both observable charge states.

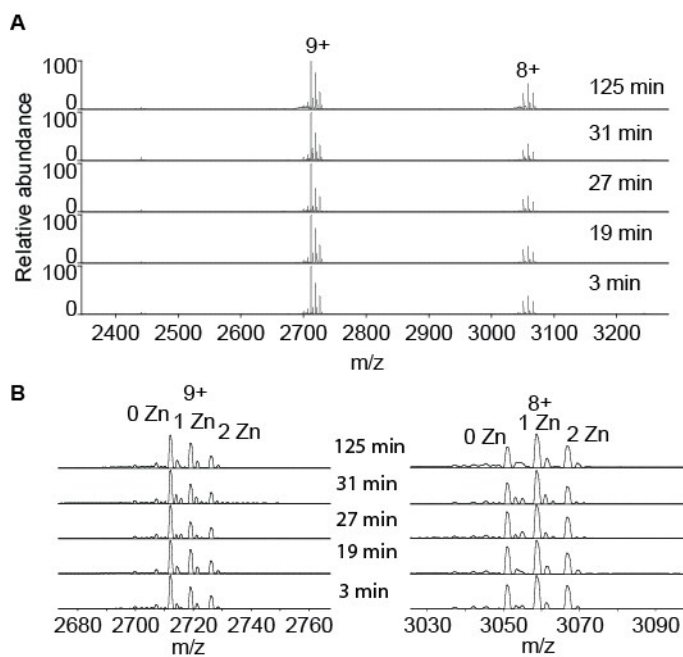

**Figure S11.** Non-denaturing mass spectra of NDM-1 (2.5  $\mu\text{M}$ ) incubated with one molar equivalent of  $\text{Zn}(\text{OAc})_2$  for 3-125 minutes. The spectra show no evidence for time dependency on the binding stoichiometry. (A) The relative abundance of the 8+ and 9+ charge states does not change. (B) The ratio of apo-, mono- and di- $\text{Zn}(\text{II})$  forms remains constant over the time course of incubation.

## References

1. A. M. Rydzik, J. Brem, S. S. van Berkel, I. Pfeffer, A. Makena, T. D. Claridge and C. J. Schofield, *Angew. Chem. Int. Ed. Engl.*, 2014, **53**, 3129-3133.
2. S. T. Cahill, H. Tarhonskaya, A. M. Rydzik, E. Flashman, M. A. McDonough, C. J. Schofield and J. Brem, *J. Inorg. Biochem.*, 2016, **163**, 185-193.
3. F. D. Kondrat, W. B. Struwe and J. L. Benesch, *Methods. Mol. Biol.*, 2015, **1261**, 349-371.
4. R. J. Rose, E. Damoc, E. Denisov, A. Makarov and A. J. Heck, *Nat. Methods.*, 2012, **9**, 1084-1086.
